# Supplementary material for: Association between the triglyceride-glucose index and impaired cardiovascular fitness in non-diabetic young population
Source: PubMed Central journal article supplement (PMC10800072; doi:10.1186/s12933-023-02089-8), 2024-01-20
Supplement: 12933_2023_2089_MOESM2_ESM.pdf [file 12933_2023_2089_MOESM2_ESM.pdf]

APPENDIX G  
CALCULATION OF ESTIMATED VO<sub>2</sub> MAX

## APPENDIX G. CALCULATION OF ESTIMATED VO<sub>2</sub> MAX

Because the relation between heart rate and oxygen consumption is linear during exercise, we can estimate maximal oxygen consumption (VO<sub>2</sub> max) by measuring the heart rate response to known levels of submaximal work. This relation can be summed up by the equation for a line:  $y = mx + b$ , where  $y$  is heart rate,  $m$  is slope,  $x$  is VO<sub>2</sub>, and  $b$  is the intercept. By rearranging these terms, we can derive the following equation:

$$\text{Estimated VO}_2\text{max} = \frac{\text{PMHR} - \text{Intercept}}{\text{Slope}}$$

$$\begin{aligned} \text{Slope} &= n(\sum x_i y_i) \text{ slope} - (\sum x_i)(\sum y_i) / n \sum x_i^2 - (\sum x_i)^2 \\ \text{PMHR} &= 220 - \text{Age at interview} \\ \text{Intercept} &= \bar{Y} - b \bar{X} \end{aligned}$$

$\bar{Y}$  = mean of End of Stage 1 Heart Rate + End of Stage 2 Heart Rate

$\bar{X}$  = mean of End of Stage 1 VO<sub>2</sub> + End of Stage 2 VO<sub>2</sub>

$b$  = slope

$$\text{Slope} = n(\sum x_i y_i) - (\sum x_i)(\sum y_i) / n \sum x_i^2 - (\sum x_i)^2$$

$$n = 2$$

$$x_i = x_1, x_2$$

$$x_1 = \text{submax VO}_2 \text{ at end of Stage 1}$$

$$x_2 = \text{submax VO}_2 \text{ at end of Stage 2}$$

$$y_i = y_1, y_2$$

$$y_1 = \text{end of Stage 1 HR}$$

$$y_2 = \text{end of Stage 2 HR}$$

Get end of stage VO<sub>2</sub> from Appendix H.

**Example:** A 40 year old man was assigned Protocol 6. Looking in Appendix G, we see that the corresponding submax VO<sub>2</sub> values for these stages are 23.3 and 31.4 ml/kg/min respectively. His heart rate at the end of Stage 1 is 120 and at the end of Stage 2 is 140 beats/min respectively. Plugging these numbers into the formulas above, we then solve our equation.

$$\text{Estimated VO}_2 \text{ max} = \frac{180 - 62.47}{2.469} = 47.6 \text{ ml/kg/min}$$
