# Supplementary material for: Association between the triglyceride-glucose index and impaired cardiovascular fitness in non-diabetic young population
Source: PubMed Central journal article supplement (PMC10800072; doi:10.1186/s12933-023-02089-8), 2024-01-20
Supplement: 12933_2023_2089_MOESM3_ESM.pdf [file 12933_2023_2089_MOESM3_ESM.pdf]

## APPENDIX I. REFERENCE RANGES FOR VO<sub>2</sub> MAX

### Males ages 12-19

|          |            |
|----------|------------|
| Low      | < 42       |
| Moderate | 42 – 51.99 |
| High     | ≥ 52       |

### Females ages 12

|          |          |
|----------|----------|
| Low      | <37      |
| Moderate | 37-45.99 |
| High     | ≥ 46     |

### Females ages 13

|          |          |
|----------|----------|
| Low      | <36      |
| Moderate | 36-44.99 |
| High     | ≥ 45     |

### Females ages 14

|          |          |
|----------|----------|
| Low      | <35      |
| Moderate | 35-43.99 |
| High     | ≥ 44     |

### Females ages 15-19

|          |            |
|----------|------------|
| Low      | <35        |
| Moderate | 35 – 42.99 |
| High     | ≥ 43       |

### Males ages 20-29

|          |             |
|----------|-------------|
| Low      | ≤ 37.13     |
| Moderate | 37.14-44.22 |
| High     | ≥ 44.23     |

### Females ages 20-29

|          |             |
|----------|-------------|
| Low      | ≤ 30.63     |
| Moderate | 30.64-36.64 |
| High     | ≥ 36.64     |

### Males ages 30-39

|          |             |
|----------|-------------|
| Low      | ≤ 35.35     |
| Moderate | 35.36-42.41 |
| High     | ≥ 42.42     |

### Females ages 30-39

|          |             |
|----------|-------------|
| Low      | ≤ 28.70     |
| Moderate | 28.71-34.59 |
| High     | ≥ 34.60     |

### Males ages 40-49

|          |             |
|----------|-------------|
| Low      | ≤ 33.04     |
| Moderate | 33.05-39.88 |
| High     | ≥ 39.89     |

### Females ages 40-49

|          |             |
|----------|-------------|
| Low      | ≤ 26.54     |
| Moderate | 26.55-32.30 |
| High     | ≥ 32.31     |

The level of cardiovascular fitness is categorized based on gender-age specific cut-points of estimated VO<sub>2</sub> max. The reference cut-points used for adults 20-49 years are based on data from the Aerobics Center Longitudinal Study (ACLS).<sup>1,2</sup> Low level of CV fitness is defined as an estimated VO<sub>2</sub> max below the 20th percentile of the ACLS data of the same gender and age group; moderate fitness is defined as a value between the 20th and 59th percentile, and high fitness level is defined as at or above the 60th percentile. The reference standards used for adolescents and young adults 12-19 years are based on the criteria used in the FITNESSGRAM program.<sup>3,4</sup>

Report of Findings statement: “Compared with other people of your age and sex, your cardiovascular fitness level is *<low, moderate, high>*.”

## References

1. American College of Sports Medicine. (1995). *ACSM's Guidelines for Exercise Testing and Prescription*, 6th edition. Philadelphia, PA: Lippincott Williams and Wilkins Company.
2. Blair, S.N., Kohl, H.W. 3rd, Paffenbarger, R.S. Jr., et al. (1989). *Physical Fitness and All-Cause Mortality. A Prospective Study of Healthy Men and Women*. JAMA, 262(17), 2395-401.
3. Cureton, K.J. and Warren, G.L. (1990). *Criterion-Referenced Standards for Youth Health-Related Fitness Tests: A Tutorial*. Research Quarterly for Exercise and Sport, 61(1), 7-19.
4. Cureton, K.J. and Plowman, S.A. (1999). *Aerobic Capacity Assessments*. In Welk G.J., Morrow, J.R. Jr., and Falls H.B. (Ed.) *Fitnessgram Reference Guide* (pp. 66-86). Dallas, TX: Cooper Institute. Available at: <http://dev.cooperinst.org/shopping/PDF%20format/Fitnessgram%20Reference%20Guide.pdf>
